# Supplementary material for: RD5-mediated lack of PE_PGRS and PPE-MPTR export in BCG vaccine strains results in strong reduction of antigenic repertoire but little impact on protection
Source: PubMed Central journal article supplement (PMC6023246; doi:10.1371/journal.ppat.1007139), 2018-06-18
Supplement: ppat.1007139.s008.pdf [file ppat.1007139.s008.pdf]

|                   | CD40 | CD80 | CD86 | H-2K <sup>b</sup> | I-A <sup>b</sup> | % Live Cells |
|-------------------|------|------|------|-------------------|------------------|--------------|
| <b>Uninfected</b> | 218  | 338  | 264  | 663               | 904              | 94.9         |
| <b>CDC1551</b>    | 282  | 449  | 427  | 982               | 1404             | 82.5         |
| <i>Δppe38-71</i>  | 287  | 424  | 446  | 925               | 1360             | 81.7         |
| <i>ppe38-71-C</i> | 303  | 457  | 454  | 969               | 1419             | 81.5         |
| <b>BCG</b>        | 273  | 430  | 390  | 810               | 1348             | 86.6         |
| <b>BCG38</b>      | 276  | 429  | 381  | 832               | 1417             | 86.8         |

**S1 Table.** Mean Fluorescent Intensities and percentage of live C57BL/6 BM-DCs, infected (MOI = 0.5) with indicated strains of *M. tuberculosis* or *M. bovis* BCG with or without the *ppe38*-locus. As expected, the percentage of live cells was higher for BCG-infected cells than for cells infected with *M. tuberculosis* strains, but did not vary significantly between isogenic strains ( $\leq 1.0$  % difference between isogenic strain). These values are derived from the experiment depicted in Fig 2A.
