# Supplementary material for: RD5-mediated lack of PE_PGRS and PPE-MPTR export in BCG vaccine strains results in strong reduction of antigenic repertoire but little impact on protection
Source: PubMed Central journal article supplement (PMC6023246; doi:10.1371/journal.ppat.1007139), 2018-06-18
Supplement: ppat.1007139.s009.pdf [file ppat.1007139.s009.pdf]

|                                                         | MHC-II                                                      | MHC-II                                                      | MHC-II                                                         | MHC-II                                                         |
|---------------------------------------------------------|-------------------------------------------------------------|-------------------------------------------------------------|----------------------------------------------------------------|----------------------------------------------------------------|
| <b>MHC Haplotype H-2<sup>b</sup></b> (C57BL/6 mice)     | I-A <sub>α</sub> <sup>b</sup>                               | I-A <sub>β</sub> <sup>b</sup>                               | (I-E <sub>α</sub> <sup>b</sup> not present)                    | I-E <sub>β</sub> <sup>b</sup>                                  |
| <b>Functional MHC-II available in H-2<sup>b</sup></b>   | I-A <sub>α</sub> <sup>b</sup> I-A <sub>β</sub> <sup>b</sup> |                                                             | No I-E available in H-2 <sup>b</sup>                           |                                                                |
| <b>MHC Haplotype H-2<sup>k</sup></b> (CBA mice)         | I-A <sub>α</sub> <sup>k</sup>                               | I-A <sub>β</sub> <sup>k</sup>                               | I-E <sub>α</sub> <sup>k</sup>                                  | I-E <sub>β</sub> <sup>k</sup>                                  |
| <b>Functional MHC-II available in H-2<sup>k</sup></b>   | I-A <sub>α</sub> <sup>k</sup> I-A <sub>β</sub> <sup>k</sup> |                                                             | I-E <sub>α</sub> <sup>k</sup> I-E <sub>β</sub> <sup>k</sup>    |                                                                |
| <b>H-2<sup>b/k</sup></b> (C57BL/6 x CBA)                | I-A <sub>α</sub> <sup>b</sup>                               | I-A <sub>β</sub> <sup>b</sup>                               | (I-E <sub>α</sub> <sup>b</sup> not present)                    | I-E <sub>β</sub> <sup>b</sup>                                  |
|                                                         | I-A <sub>α</sub> <sup>k</sup>                               | I-A <sub>β</sub> <sup>k</sup>                               | I-E <sub>α</sub> <sup>k</sup>                                  | I-E <sub>β</sub> <sup>k</sup>                                  |
| <b>Functional MHC-II available in H-2<sup>b/k</sup></b> | Not only                                                    | I-A <sub>α</sub> <sup>b</sup> I-A <sub>β</sub> <sup>b</sup> | I-A <sub>α</sub> <sup>k</sup><br>I-A <sub>β</sub> <sup>k</sup> | I-E <sub>α</sub> <sup>k</sup><br>I-E <sub>β</sub> <sup>k</sup> |
|                                                         | But also                                                    | I-A <sub>α</sub> <sup>b</sup> I-A <sub>β</sub> <sup>k</sup> | I-A <sub>α</sub> <sup>k</sup><br>I-A <sub>β</sub> <sup>b</sup> | I-E <sub>α</sub> <sup>k</sup><br>I-E <sub>β</sub> <sup>b</sup> |

**S2 Table.** Why there are more variants of MHC-II restricting molecules available in C57BL/6 x CBA F1 mice than in C57BL/6 or CBA mice? A promoter mutation disrupts production of I-E<sub>α</sub><sup>b</sup> in C57BL/6 mice (Grey font), which are therefore unable to produce MHC-II I-E (Grey). In contrast, H-2<sup>k</sup> mice can produce both I-A<sub>α</sub><sup>k</sup>I-A<sub>α</sub><sup>k</sup> and I-E<sub>α</sub><sup>k</sup>I-E<sub>α</sub><sup>k</sup>. C57BL/6 x CBA F1 mice have an even bigger repertoire of possible functional MHC-II isoforms available due to heterodimerization of α and β subunits from H-2<sup>b</sup> and H-2<sup>k</sup> haplotypes.
