# Supplementary material for: RD5-mediated lack of PE_PGRS and PPE-MPTR export in BCG vaccine strains results in strong reduction of antigenic repertoire but little impact on protection
Source: PubMed Central journal article supplement (PMC6023246; doi:10.1371/journal.ppat.1007139), 2018-06-18
Supplement: ppat.1007139.s010.pdf [file ppat.1007139.s010.pdf]

| <b>Epitope<br/>PPE10<sub>221-235</sub></b> | <b>Protein<br/>Number</b> | <b>Amino acid<br/>Sequence Identity</b>            | <b>Sequence identity<br/>(100%)</b> |
|--------------------------------------------|---------------------------|----------------------------------------------------|-------------------------------------|
| PPE10                                      | Rv0442c                   | GSGNTGSGNLGLGNL                                    | 100                                 |
| PPE13                                      | Rv0878c                   | GSGN <b>EG</b> SGNL <b>GF</b> GNL                  | 86.7                                |
| PPE39                                      | Rv2353c                   | <b>GF</b> GNTGSGN <b>FG</b> FGNT                   | 80.0                                |
| PPE53                                      | Rv3159c                   | GSGNTG <b>STN</b> FG <b>GG</b> NL                  | 80.0                                |
| PPE16                                      | Rv1135c                   | GSGN <b>DGN</b> GN <b>F</b> GLGNI                  | 73.3                                |
| PPE21                                      | Rv1548c                   | GSGN <b>L</b> GSGN <b>I</b> FGNK                   | 73.3                                |
| PPPE56                                     | Rv3350c                   | <b>GL</b> GN <b>VGD</b> NLGLGNI                    | 73.3                                |
| PPE40                                      | Rv2356c                   | <b>GF</b> GNTGSGN <b>FG</b> FGNT                   | 73.3                                |
| PPE55                                      | Rv3347c                   | GSGN <b>V</b> GF <b>GNM</b> GVGNI                  | 66.7                                |
| PPE34                                      | Rv1917c                   | G <b>I</b> GNTG <b>TGN</b> FG <b>I</b> GN <b>S</b> | 66.7                                |
| PPE6                                       | Rv0305c                   | G <b>I</b> GN <b>S</b> GTGN <b>F</b> GLGNT         | 66.7                                |
| PPE8                                       | Rv0355c                   | G <b>I</b> GNTG <b>TGN</b> I <b>F</b> FGNT         | 66.7                                |
| PPE5                                       | Rv0304c                   | G <b>I</b> GNTG <b>TGN</b> FG <b>I</b> GN <b>S</b> | 66.7                                |
| PPE62                                      | Rv3533c                   | G <b>T</b> GN <b>A</b> GSGN <b>I</b> GAGNT         | 66.7                                |
| PPE54                                      | Rv3343c                   | GSGN <b>V</b> GS <b>YN</b> VGAGN <b>V</b>          | 66.7                                |
| PPE24                                      | Rv1753c                   | <b>GF</b> GN <b>L</b> GS <b>NN</b> VGVGNL          | 66.7                                |
| PPE42                                      | Rv2608                    | <b>A</b> SGN <b>L</b> GSGN <b>V</b> GVGNI          | 66.7                                |
| PPE64                                      | Rv3558                    | G <b>A</b> GN <b>V</b> GTGN <b>I</b> FGN <b>Q</b>  | 60.0                                |
| PPE35                                      | Rv1918                    | G <b>I</b> GN <b>A</b> GANN <b>F</b> GLANL         | 60.0                                |

| <b>Epitope<br/>PPE10<sub>381-395</sub></b> | <b>Protein<br/>Number</b> | <b>Amino acid<br/>Sequence Identity</b>           | <b>Sequence identity<br/>(100%)</b> |
|--------------------------------------------|---------------------------|---------------------------------------------------|-------------------------------------|
| PPE10                                      | Rv0442c                   | NVLNSGLTNT <b>P</b> VAA <b>P</b>                  | 100                                 |
| PPE12                                      | Rv0755c                   | <b>G</b> FLNSGLTNT <b>GF</b> AN <b>S</b>          | 60.0                                |
| PPE8                                       | Rv0355c                   | <b>G</b> LLN <b>A</b> GLVNT <b>G</b> IAN <b>P</b> | 53.3                                |

**S3 Table.** Sequence identity determined by BlastP search of immunogenic epitopes against the genome of *M. tuberculosis* H37Rv [29,106]. Black letters indicate identical amino acids. Red letters indicate non-identical amino acids. Top: homologues of the MPTR-containing peptide PPE10<sub>221-235</sub> ordered by percentage of sequence identity. Bottom: Homologues of the peptide PPE10<sub>381-395</sub>, which is part of the C-terminal secreted domain of PPE10.
