# Supplementary material for: RD5-mediated lack of PE_PGRS and PPE-MPTR export in BCG vaccine strains results in strong reduction of antigenic repertoire but little impact on protection
Source: PubMed Central journal article supplement (PMC6023246; doi:10.1371/journal.ppat.1007139), 2018-06-18
Supplement: ppat.1007139.s011.pdf [file ppat.1007139.s011.pdf]

| <b>Primer name</b> | <b>Sequence 5'→3'</b>                  |
|--------------------|----------------------------------------|
| RD5B-plcA.int.F    | CAAGTTGGGTCTGGTCTCGAAT [52]            |
| RD5B-plcA.int.R    | GCTACCCAAGGTCTCCTGGT [52]              |
| PPE38F             | TTTTTCGGTGTGGATTGTCT [38]              |
| PPE38R             | CCAGGGATTTCCAACGAC [38]                |
| PPE10 KO LF        | TTTTTTTTTCAGCTTCTGACCGGCGCCAACATCGTGAA |
| PPE10 KO LR        | TTTTTTTTTCAGAGACTGCCTGGCGAACGTCCTCAACT |
| PPE10 KO RF        | TTTTTTTTTCAGTTCCTGACGGAGCCAAGCGACGCTAT |
| PPE10 KO RR        | TTTTTTTTTCAGAACTGCTCGACCGCACTGGCATTCA  |
| PPE10(mtb) flank F | GAACAGCGACTCCGACTACG                   |
| PPE10(mtb) flank R | CTCGACCGCACTGGCATTCA                   |
| p0004s-HL          | AGGATCCAGGACCTGCCAAT                   |
| p0004s-HR          | CTTCACCGATCCGGAGGAAC                   |

**S4 Table. Primers used in this study**
