# Supplementary material for: RD5-mediated lack of PE_PGRS and PPE-MPTR export in BCG vaccine strains results in strong reduction of antigenic repertoire but little impact on protection
Source: PubMed Central journal article supplement (PMC6023246; doi:10.1371/journal.ppat.1007139), 2018-06-18
Supplement: ppat.1007139.s012.pdf [file ppat.1007139.s012.pdf]

| Species                                              | Strain code        | reference                                                                                       | Notes                                                                                                |
|------------------------------------------------------|--------------------|-------------------------------------------------------------------------------------------------|------------------------------------------------------------------------------------------------------|
| <i>Mycobacterium canettii</i>                        | STB-A              | [48]                                                                                            |                                                                                                      |
| <i>Mycobacterium canettii</i>                        | STB-D              | [48]                                                                                            |                                                                                                      |
| <i>Mycobacterium canettii</i>                        | STB-J              | [48]                                                                                            |                                                                                                      |
| <i>Mycobacterium canettii</i>                        | STB-K              | [48]                                                                                            |                                                                                                      |
| <i>Mycobacterium canettii</i>                        | STB-L              | [48]                                                                                            |                                                                                                      |
| <i>Mycobacterium bovis</i>                           | CVL<br>AF2122/97   | <a href="http://genolist.pasteur.fr/BoviList">http://<br/>genolist.pasteur.fr/<br/>BoviList</a> |                                                                                                      |
| <i>Mycobacterium caprae</i>                          | 140080001          |                                                                                                 | Pasteur strain collection                                                                            |
| <i>Mycobacterium orygis</i>                          | 802564             | [56]                                                                                            | Pasteur strain collection                                                                            |
| <i>Mycobacterium pinnipedii</i>                      | 140090001          |                                                                                                 | Pasteur strain collection                                                                            |
| <i>Mycobacterium bovis</i><br>BCG                    | BCG<br>Pasteur     | [5,6]                                                                                           |                                                                                                      |
| <i>Mycobacterium bovis</i><br>BCG                    | BCG<br>Danish      | [5,6]                                                                                           |                                                                                                      |
| <i>Mycobacterium bovis</i><br>BCG                    | BCG Tice           | [5,6]                                                                                           |                                                                                                      |
| <i>Mycobacterium bovis</i><br>BCG                    | BCG<br>Tokyo       | [5,6]                                                                                           |                                                                                                      |
| <i>Mycobacterium bovis</i><br>BCG                    | BCG<br>Russia      | [5,6]                                                                                           |                                                                                                      |
| <i>Mycobacterium bovis</i><br>BCG                    | BCG38              | This study                                                                                      | BCG Danish - pMV:: <i>ppe38-71</i>                                                                   |
| CDC1551                                              |                    |                                                                                                 |                                                                                                      |
| CDC1551 $\Delta$ mt2419-22                           | <i>Appe38-71</i>   | [37]                                                                                            |                                                                                                      |
| CDC1551 $\Delta$ mt0458                              | <i>Appe10</i>      | This study                                                                                      |                                                                                                      |
| CDC1551 $\Delta$ mt2419-22,<br>pMV:: <i>ppe38-71</i> | <i>Appe38-71-C</i> | [37]                                                                                            | <i>Appe38-71</i> -pMV:: <i>ppe38-71</i>                                                              |
| CDC1551 <i>eccC5::tn</i>                             | <i>eccC5::tn</i>   | BEI resources & [57]                                                                            | BEI resources strain: JHU1783-2086 /<br>Transposon Mutant 1291 (MT1844,<br>Rv1795) (BEI ID NR-14751) |
| H37Rv wild-type                                      |                    |                                                                                                 | Reference strain                                                                                     |
| H37Rv <i>Appe25-pe19</i>                             | <i>Appe25-pe19</i> | [76]                                                                                            |                                                                                                      |
| MT13848                                              |                    | [51]                                                                                            | Clinical strain, Sublineage Mn                                                                       |
| MT5531                                               |                    | [51]                                                                                            | Clinical strain, Sublineage Mj-III.a                                                                 |
| MT4854                                               |                    | [51]                                                                                            | Clinical strain, Sublineage Mj-III.b                                                                 |
| MT140                                                |                    | [51]                                                                                            | Clinical strain, Sublineage Mj-IV.c                                                                  |
| MT4884                                               |                    | [51]                                                                                            | Clinical strain, Sublineage Mj-V.a                                                                   |
| MT3000                                               |                    | [51]                                                                                            | Clinical strain, Sublineage Mj-V.c                                                                   |
| BCG:: <i>RD5</i>                                     |                    | [16]                                                                                            | BCG Pasteur containing cosmid<br>pYUB:: <i>RD5</i>                                                   |

**S5 Table. Bacterial strains used in this study**
